# Supplementary material
Source: MDPI journal article supplement (https://www.mdpi.com/2071-1050/12/22/9663)
Supplement: s1 [file s1]

## Supplementary material nr. 1

**Table S1.** Sections (and sub-sections) of the implemented questionnaire and the respective number as well as type of questions included in each one. Besides, for each sub-section, details on the data analysis executed are shown. It is worth mentioning that the spearman's correlation was performed using a combined measure of the literacy about Natura 2000 (for each participant, it was calculated the sum of the correct answers given to the sub-sections 5-c and 5-d) and each variable marked below. The specific ecological behaviours assessed are discriminated on table 3 (found within the article).

| Section                                | Questionnaire                            |                  |                                    | Data analysis |                              |                        |
|----------------------------------------|------------------------------------------|------------------|------------------------------------|---------------|------------------------------|------------------------|
|                                        | Sub-sections                             | Nr. of questions | Types of questions                 | %             | Average + Standard deviation | Spearman's correlation |
| (1) Demographic data                   | (a) Age                                  | 1                | Open-ended, short answer           | X             |                              |                        |
|                                        | (b) Gender                               | 1                | Close-ended                        | X             |                              |                        |
|                                        | (c) Place of residency                   | 1                | Close-ended                        | X             |                              |                        |
|                                        | (d) Education level                      | 1                | Close-ended                        | X             |                              |                        |
|                                        | (e) Job / Studies field                  | 1                | Close-ended                        | X             |                              |                        |
| (2) Awareness about Natura 2000        | -                                        | 1                | Close-ended                        | X             |                              |                        |
| (3) Ecological behaviours              | -                                        | 5                | Close-ended (5-point Likert scale) |               | X                            | X                      |
| (4) Knowledge about threatened species | -                                        | 1                | Open-ended, long answer            | X             | X                            | X                      |
| (5) Knowledge about Natura 2000        | (a) Natura 2000 sites in Portugal        | 1                | Open-ended, long answer            |               | X                            |                        |
|                                        | (b) Favourite Natura 2000 site           | 1                | Open-ended, short answer           | X             |                              |                        |
|                                        | (c) Species inhabiting Natura 2000 sites | 1                | Open-ended, long answer            | X             | X                            |                        |
|                                        | (d) Threats to Natura 2000 sites         | 1                | Close-ended                        | X             | X                            |                        |
|                                        | (e) Visits to Natura 2000                | 1                | Close-ended                        |               |                              | X                      |
